1 **PRMT5 regulates ovarian follicle development by facilitating *Wt1***  
2 **translation**

3 Min Chen<sup>1,2,#,&</sup>, Fangfang Dong<sup>1,2,3#</sup>, Min Chen<sup>4,&</sup>, Zhiming Shen<sup>1,2,3</sup>, Haowei Wu<sup>1,2,3</sup>, Changhuo  
4 Cen<sup>1,2,3</sup>, Xiuhong Cui<sup>1,2</sup>, Shilai Bao<sup>5</sup>, Fei Gao<sup>1,2,3,\*</sup>

5  
6 <sup>1</sup>State Key Laboratory of Stem Cell and Reproductive Biology, Institute of Zoology,  
7 Chinese Academy of Sciences, Beijing, 100101, P. R. China

8 <sup>2</sup>Institute for Stem Cell and Regeneration, Chinese Academy of Sciences, Beijing  
9 100101, P. R. China

10 <sup>3</sup>University of Chinese Academy of Sciences, Beijing, 100049, P. R. China

11 <sup>4</sup>Guangdong and Shenzhen Key Laboratory of Male Reproductive Medicine and  
12 Genetics, Institute of Urology, Peking University Shenzhen Hospital, Shenzhen  
13 Peking University-Hong Kong University of Science and Technology Medical Center,  
14 Shenzhen, Guangdong 518036, P. R. China

15 <sup>5</sup>State Key Laboratory of Molecular Developmental Biology, Institute of Genetics and  
16 Developmental Biology, Chinese Academy of Sciences, Beijing, 100101, P. R. China

17 #Co-first author

18 \*Correspondence to: Fei Gao, [gaof@ioz.ac.cn](mailto:gaof@ioz.ac.cn) (F.G.)

19 &The same name for different person

20

21 **Running title:** PRMT5 in follicle development

22

23 **Abstract**

24 Protein arginine methyltransferase 5 (*Prmt5*) is the major type II enzyme  
25 responsible for symmetric dimethylation of arginine. Here, we found PRMT5 was  
26 expressed at high level in ovarian granulosa cells of growing follicles. Inactivation of  
27 *Prmt5* in granulosa cells resulted in aberrant follicle development and female  
28 infertility. In *Prmt5*-knockout mice, follicle development was arrested with  
29 disorganized granulosa cells in which WT1 expression was dramatically reduced and  
30 the expression of steroidogenesis-related genes was significantly increased. The  
31 premature differentiated granulosa cells were detached from oocytes and follicle  
32 structure was disrupted. Mechanism studies revealed that *Wtl* expression was  
33 regulated by PRMT5 at the protein level. PRMT5 facilitated IRES-dependent  
34 translation of *Wtl* mRNA by methylating HnRNPA1. Moreover, the upregulation of  
35 steroidogenic genes in *Prmt5*-deficient granulosa cells was repressed by *Wtl*  
36 overexpression. These results demonstrate PRMT5 participates in granulosa cell  
37 lineage maintenance by inducing *Wtl* expression. Our study uncovers a new role of  
38 post-translational arginine methylation in granulosa cell differentiation and follicle  
39 development.

40

41 **Keywords:** ovary; granulosa cells; PRMT5; *Wtl*; IRES

42

## 43 **Introduction**

44 Follicles are the basic functional units in the ovaries. Each follicle consists of an  
45 oocyte, the surrounding granulosa cells and theca cells in the mesenchyme. The  
46 interaction between oocytes and somatic cells is crucial for follicle development.  
47 Follicle maturation experiences primordial, primary, secondary, and antral follicular  
48 stages. Primordial follicles are formed shortly after birth via breakdown of oocyte  
49 syncytia. Each primordial follicle is composed of an oocyte surrounded by a single  
50 layer of flattened pregranulosa cells that remains in a dormant phase until being  
51 recruited into the primary stage under the influence of two main signaling pathways<sup>1</sup>.  
52 Once activated, flattened granulosa cells become cuboidal, and follicles continue to  
53 grow through proliferation of granulosa cells and enlargement of oocytes.  
54 Development of high-quality oocytes is important for female reproductive health and  
55 fertility<sup>1-4</sup>. Although gonadotropin, follicle-stimulating hormone (FSH) and  
56 luteinizing hormone (LH) are important for the growth of antral follicles, the early  
57 stages of follicle development are driven by a local oocyte-granulosa cell dialog.  
58 Abnormalities in this process may lead to follicle growth arrest or atresia<sup>2,5</sup>.

59 Granulosa cells are derived from progenitors of the coelomic epithelium that  
60 direct sexual differentiation at the embryonic stage and support oocyte development  
61 postnatally<sup>4,6</sup>. Theca-interstitial cell differentiation occurs postnatally along with the  
62 formation of secondary follicles. The steroid hormone produced by theca-interstitial  
63 cells plays important roles in follicle development and maintenance of secondary  
64 sexual characteristics<sup>4</sup>. The Wilms' tumor (WT) suppressor gene *Wt1* is a nuclear

65 transcription factor indispensable for normal development of several tissues. In  
66 gonads, *Wtl* is mainly expressed in ovarian granulosa cells and testicular Sertoli cells.  
67 During follicle development, *Wtl* is expressed at high levels in granulosa cells of  
68 primordial, primary and secondary follicles, but its expression is decreased in antral  
69 follicles<sup>7</sup>. Our previous studies demonstrated that *Wtl* is required for the lineage  
70 specification and maintenance of Sertoli and granulosa cells<sup>8,9</sup>. However, the  
71 underlying mechanism that regulates the expression of *Wtl* in granulosa cells is  
72 unknown.

73 Protein arginine methyltransferase 5 (PRMT5) is a member of the PRMT family  
74 that catalyzes the transfer of methyl groups from S-adenosylmethionine to a variety of  
75 substrates and is involved in many cellular processes, such as cell growth,  
76 differentiation and development<sup>10-12</sup>. PRMT5 is the predominant type II  
77 methyltransferase that catalyzes the formation of most symmetric dimethylarginines  
78 (SDMAs) in the cells and regulates gene expression at the transcriptional and  
79 posttranscriptional levels<sup>10</sup>. PRMT5 forms a complex with its substrate-binding  
80 partner, the WD-repeat protein MEP50 (or WDR77), which greatly enhances the  
81 methyltransferase activity of PRMT5 by increasing its affinity for protein substrates<sup>11</sup>.

82 In gonad development, inactivation of *Prmt5* specifically in primordial germ  
83 cells (PGCs) causes massive loss of PGCs<sup>13-15</sup>. PRMT5 promotes PGC survival by  
84 regulating RNA splicing<sup>13</sup> and suppressing transposable elements at the time of global  
85 DNA demethylation<sup>14</sup>. In this study, we found that PRMT5 is expressed at high level  
86 in ovarian granulosa cells of growing follicles and the expression level changes with

87 follicle development, suggesting that PRMT5 in granulosa cells plays a role in follicle  
88 development. To test the function of PRMT5 in granulosa cells, we specifically  
89 inactivated *Prmt5* in granulosa cells using *Sfl-cre*. We found that *Prmt5<sup>lox/lox</sup>;Sfl-cre*  
90 female mice were infertile and that follicles were arrested at the preantral stage. The  
91 expression of WT1 was dramatically reduced, and the granulosa cells in secondary  
92 follicles began to express steroidogenic genes. Further studies revealed that PRMT5  
93 regulates follicle development by facilitating *Wt1* translation.

94

## 95 **Results**

96 *Deletion of Prmt5 in granulosa cells caused aberrant ovary development and female*  
97 *infertility.*

98 The expression of PRMT5 in ovarian granulosa cells was examined by  
99 immunofluorescence. As shown in Fig. S1, PRMT5 (red) was expressed in oocytes,  
100 but no PRMT5 signal was detected in the granulosa cells of primordial follicles (A, A',  
101 white arrows). PRMT5 started to be expressed in granulosa cells of primary follicles  
102 (B, B', white arrows) and was continuously expressed in granulosa cells of secondary  
103 follicles (C, C', white arrows), preantral follicles (D, D', white arrows), and antral  
104 follicles (E, E', white arrows), but its expression decreased significantly in the corpus  
105 luteum (F, F', white arrows). To test the functions of PRMT5 in granulosa cell  
106 development, we specifically deleted *Prmt5* in granulosa cells by crossing *Prmt5<sup>lox/lox</sup>*  
107 mice with *Sfl-cre* transgenic mice. In *Prmt5<sup>lox/lox</sup>;Sfl-cre* female mice, PRMT5  
108 expression was completely absent from granulosa cells (Fig. S2, arrows in B, D),

109 whereas the expression of PRMT5 in oocytes and interstitial cells was not affected,  
110 suggesting that *Prmt5* was specifically deleted in granulosa cells.

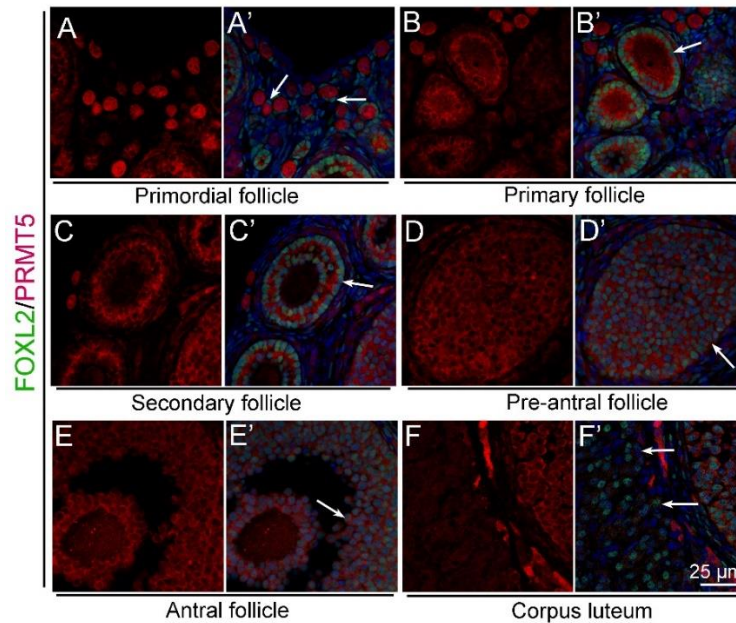

112 **Figure S1. PRMT5 was expressed in granulosa cells of growing follicles.** The expression of  
113 PRMT5 was examined by immunofluorescence (red), and granulosa cells were labeled with  
114 FOXL2 (green). PRMT5 was not expressed in granulosa cells of primordial follicles (A, A', white  
115 arrows). PRMT5 was expressed in granulosa cells of primary follicles (B, B', white arrows),  
116 secondary follicles (C, C', white arrows), preantral follicles (D, D', white arrows), and antral  
117 follicles (E, E', white arrows). No PRMT5 signal was detected in the corpus luteum (F, F', white  
118 arrows). DAPI (blue) was used to stain the nuclei.

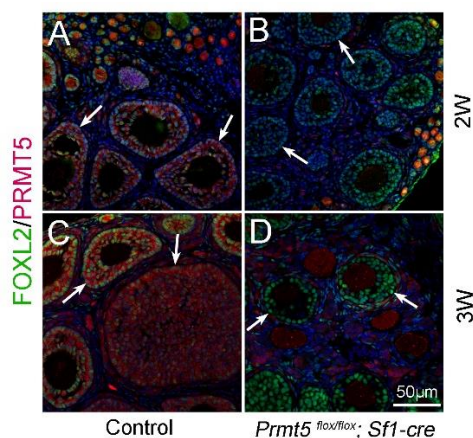

120 **Figure S2. *Prmt5* was deleted in granulosa cells of *Prmt5<sup>flox/flox</sup>; Sf1-cre* mice.** The expression of  
121 PRMT5 was examined by immunofluorescence (red), and granulosa cells were labeled with  
122 FOXL2 (green). PRMT5 protein was detected in granulosa cells of control ovaries at 2 weeks (A,  
123 white arrows) and 3 weeks (C, white arrows) after birth. No PRMT5 signal was detected in  
124 granulosa cells of *Prmt5<sup>flox/flox</sup>; Sf1-cre* ovaries at 2 weeks (B, white arrows) and 3 weeks (D, white  
125 arrows). DAPI (blue) was used to stain the nuclei.

126 No obvious developmental abnormalities were observed in adult  
127 *Prmt5<sup>flox/flox</sup>;Sfl-cre* mice (Fig. 1A). However, the female mice were infertile with  
128 atrophic ovaries (Fig. 1B). The results of immunohistochemistry showed growing  
129 follicles at different stages in control ovaries at 2 months of age (Fig. 1C). In contrast,  
130 only a small number of follicles and few corpora lutea were observed in  
131 *Prmt5<sup>flox/flox</sup>;Sfl-cre* mice (Fig. 1D). We further examined follicle development in  
132 *Prmt5<sup>flox/flox</sup>;Sfl-cre* mice at different developmental stages. As shown in Fig. 1, a  
133 large number of growing follicles at the primary and secondary stages were observed  
134 in *Prmt5<sup>flox/flox</sup>;Sfl-cre* mice (F) at 2 weeks, which was comparable to the situation in  
135 control ovaries (E). Most of the follicles were at the preantral and antral follicle stages  
136 in control mice at 3 weeks (G), whereas the development of follicles in  
137 *Prmt5<sup>flox/flox</sup>;Sfl-cre* mice was arrested, and aberrant granulosa cells were observed  
138 (H). The defects in follicle development were more obvious at 4 (J) and 5 weeks (L).  
139 The number of granulosa cells around oocytes was dramatically reduced, and follicle  
140 structure was disrupted.

141

142

143

144

145

146

147

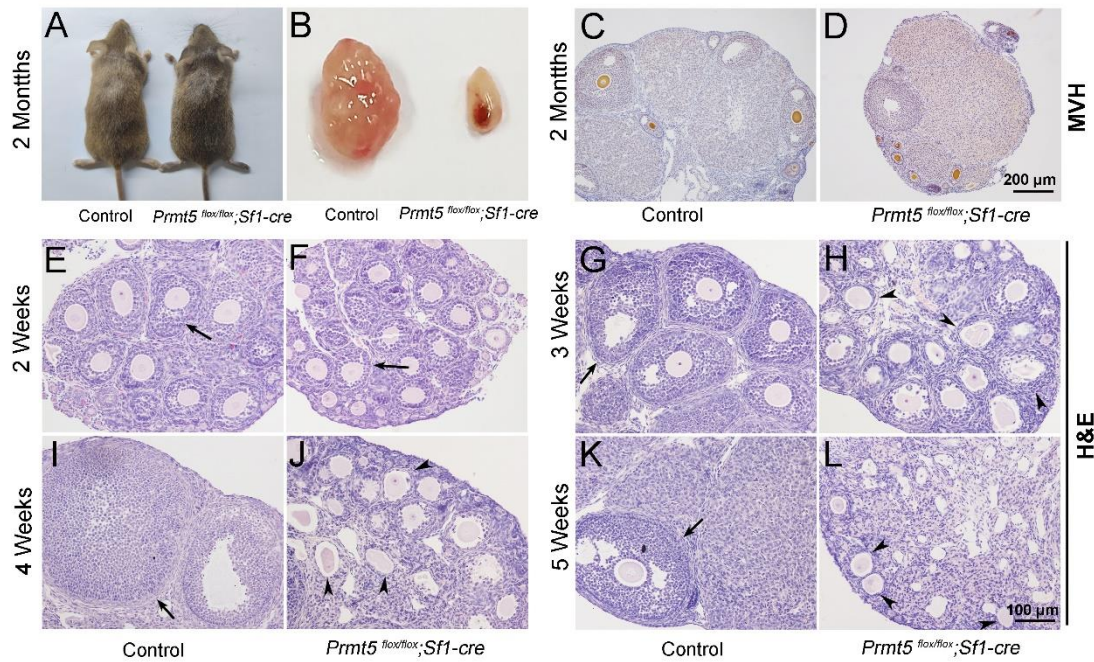

148

149 **Figure 1. Loss of *Prmt5* in granulosa cells caused aberrant follicle development and female**  
150 **infertility.** No developmental abnormalities were observed in *Prmt5<sup>flox/flox</sup>;Sf1-cre* mice (A) at  
151 2 months of age, and the ovary size was dramatically reduced (B). Morphology of ovaries from  
152 control (C) and *Prmt5<sup>flox/flox</sup>;Sf1-cre* mice (D) at 2 months of age. The morphology of ovarian  
153 follicles was grossly normal in *Prmt5<sup>flox/flox</sup>* mice at 2 weeks (F, black arrows). Defects in follicle  
154 development were observed in *Prmt5*-mutant mice at 3 weeks (H, black arrowheads). Aberrant  
155 ovarian follicles with disorganized granulosa cells were observed in *Prmt5<sup>flox/flox</sup>;Sf1-cre* mice at 4  
156 (J, black arrowheads) and 5 (L, black arrowheads) weeks of age.

157

158 *The identity of granulosa cells in *Prmt5<sup>flox/flox</sup>;Sf1-cre* mice was changed.*

159 To explore the underlying mechanism that caused the defects in follicle  
160 development in *Prmt5<sup>flox/flox</sup>;Sf1-cre* mice, the expression of granulosa cell-specific  
161 genes was analyzed by immunohistochemistry. As shown in Fig. 2, FOXL2 protein  
162 was expressed in the granulosa cells of both control (A, C) and *Prmt5<sup>flox/flox</sup>;Sf1-cre*  
163 mice (B, D) at P14 and P18. WT1 protein was expressed in granulosa cells of primary,  
164 secondary and preantral follicles in control mice at P14 and P18 (E, E', G, G', arrows).  
165 WT1 was also detected in the follicles of *Prmt5<sup>flox/flox</sup>;Sf1-cre* mice at P14 (F, arrow).  
166 However, not all the granulosa cells were WT1-positive; some of them were



167 WT1-negative (F', arrowheads). The WT1 signal was almost completely absent from  
168 the majority of granulosa cells in *Prmt5<sup>fllox/fllox</sup>;Sf1-cre* mice at P18 (H, H'); very few  
169 granulosa cells were WT1-positive (H', arrowheads). We also found that the  
170 granulosa cells in control ovaries were cuboidal and well-organized (G', arrow). In  
171 contrast, the granulosa cells in *Prmt5<sup>fllox/fllox</sup>;Sf1-cre* mice were flattened (H', dashed  
172 line circle) and were indistinguishable from surrounding stromal cells. The decreased  
173 WT1 protein expression in *Prmt5*-deficient granulosa cells was also confirmed by  
174 FOXL2/WT1 double staining (Fig. S3).

175

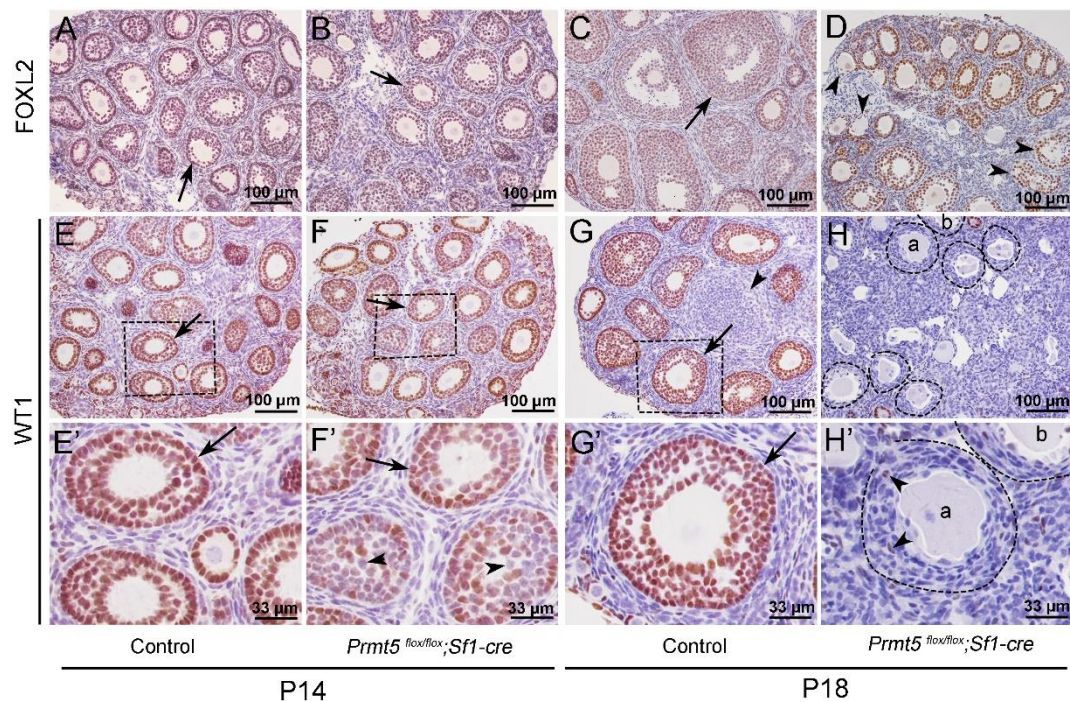

176

177 **Figure 2. The expression of WT1 was dramatically reduced in the granulosa cells of**  
178 ***Prmt5<sup>fllox/fllox</sup>;Sf1-cre* mice at P18.** The expression of FOXL2 and WT1 in granulosa cells of  
179 control and *Prmt5<sup>fllox/fllox</sup>;Sf1-cre* mice was examined by immunohistochemistry. FOXL2 protein  
180 was expressed in the granulosa cells of both control (A, C) and *Prmt5<sup>fllox/fllox</sup>;Sf1-cre* mice (B, D) at  
181 P14 and P18. WT1 protein was expressed in granulosa cells of primary, secondary and preantral  
182 follicles in control mice at P14 and P18 (E, E', G, G', black arrows). WT1 expression was absent  
183 from most granulosa cells in *Prmt5<sup>fllox/fllox</sup>;Sf1-cre* mice at P18 (H, H'); only very few granulosa  
184 cells were WT1-positive (H', black arrowheads). E'-H' are the magnified views of E-H,  
185 respectively.

186

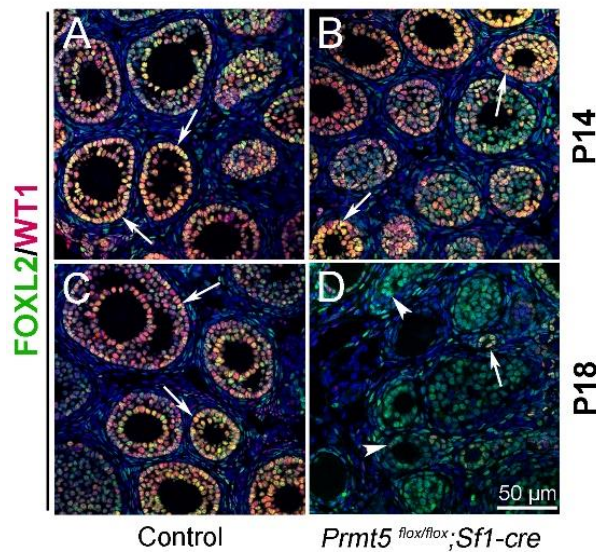

187

188 **Figure S3. WT1 expression was decreased significantly in *Prmt5<sup>flox/flox</sup>;Sf1-cre* granulosa cells**  
189 **at P18.** The expression of FOXL2 (green) and WT1 (red) in ovaries of control and  
190 *Prmt5<sup>flox/flox</sup>;Sf1-cre* mice at P14 and P18 was examined by immunofluorescence. WT1 expression  
191 was decreased dramatically in *Prmt5<sup>flox/flox</sup>;Sf1-cre* granulosa cells at P18 (D, arrowheads). Few  
192 WT1-positive granulosa cells remained (D, arrows). DAPI (blue) was used to stain the nuclei.

193

194 *Wtl* plays a critical role in granulosa cell development, and mutation of *Wtl*  
195 leads to pregranulosa cell-to-steroidogenic cell transformation<sup>8,9</sup>. Therefore, we  
196 further examined the expression of steroidogenic genes in *Prmt5*-deficient granulosa  
197 cells at P18. As shown in Fig. 3, in control ovaries, 3 $\beta$ -HSD (3 $\beta$ -hydroxysteroid  
198 dehydrogenase, also known as Hsd3B1) and CYP11A1 (cytochrome P450, family 11,  
199 subfamily a, polypeptide 1, also known as P450scc) were expressed in  
200 theca-interstitial cells (A, C, arrowheads). In addition to theca-interstitial cells,  
201 3 $\beta$ -HSD (B, green, arrows) and CYP11A1 (D, red, arrows) were also detected in the  
202 granulosa cells of *Prmt5<sup>flox/flox</sup>;Sf1-cre* mice. We also examined the expression of SF1  
203 (steroidogenic factor 1, also known as NR5A1), which is a key regulator of steroid  
204 hormone biosynthesis<sup>16</sup>. As expected, SF1 was expressed only in theca-interstitial

205 cells of control ovaries (E, red, arrowheads), whereas a high level of SF1 expression  
206 was detected in *Prmt5*-deficient granulosa cells (F, red, arrows), suggesting the  
207 identity of granulosa cells was changed. The follicle structure was destroyed as  
208 indicated by disorganized Laminin staining (H, arrows). The proliferation and  
209 apoptosis of *Prmt5*-deficient granulosa cells were analyzed by BrdU incorporation  
210 and TUNEL assays. As shown in Fig. S4, the numbers of TUNEL-positive cells and  
211 BrdU-positive granulosa cells were not changed in *Prmt5<sup>fllox/fllox</sup>;Sf1-cre* ovaries  
212 compared to control ovaries at P14 and P18.

213

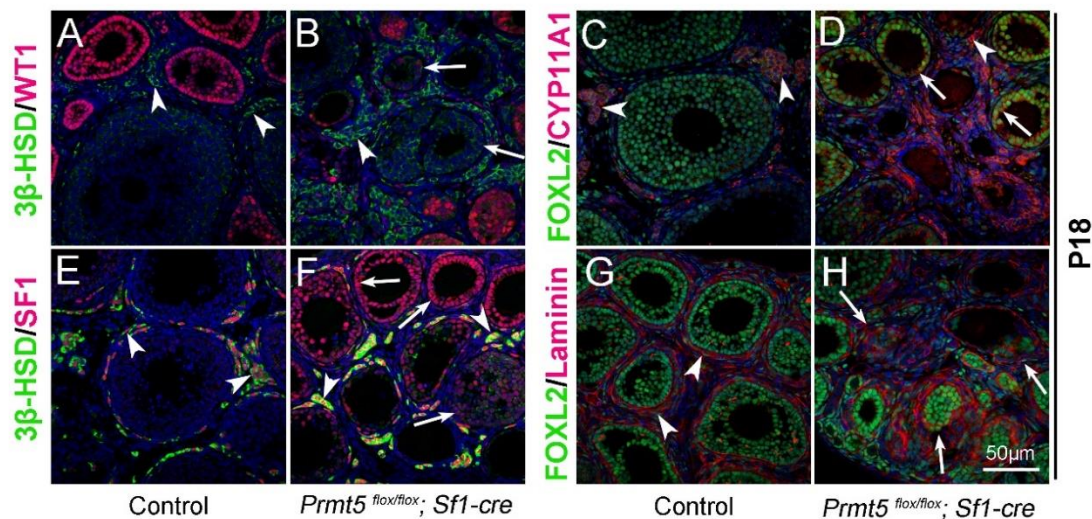

214

215 **Figure 3. The identity of granulosa cells in *Prmt5<sup>fllox/fllox</sup>;Sf1-cre* mice was changed.** The  
216 expression of 3β-HSD, WT1, FOXL2, CYP11A1, and SF1 in ovaries of control and  
217 *Prmt5<sup>fllox/fllox</sup>;Sf1-cre* mice at P18 was examined by immunofluorescence. In control ovaries,  
218 3β-HSD (A), CYP11A1 (C), and SF1 (E) were expressed only in theca-interstitial cells (white  
219 arrowheads). In the ovaries of *Prmt5<sup>fllox/fllox</sup>;Sf1-cre* mice, 3β-HSD (B), CYP11A1 (D), and SF1 (F)  
220 were also detected in granulosa cells (white arrows). The arrows in H point to the disordered  
221 follicle structure as shown by Laminin expression. DAPI (blue) was used to stain the nuclei.

222

223

224

225

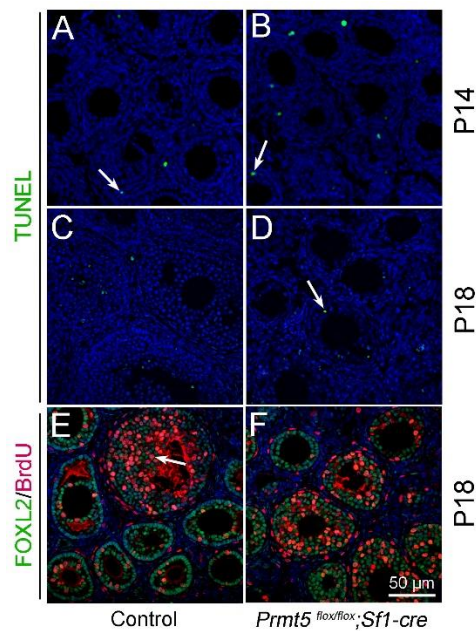

226

227 **Figure S4. The apoptosis and proliferation of granulosa cells was not changed in**  
228 ***Prmt5<sup>flox/flox</sup>;Sf1-cre* mice at P14 and P18.** Apoptosis and cell proliferation were assessed by  
229 TUNEL assay (A-D) and BrdU incorporation assay (E-F), respectively. The numbers of  
230 TUNEL-positive cells and BrdU-positive cells were not different in *Prmt5<sup>flox/flox</sup>;Sf1-cre* ovaries  
231 compared to control ovaries. DAPI (blue) was used to stain the nuclei.

232

233 To further confirm the above results, follicles were dissected from the ovaries of  
234 2-week-old mice and cultured in vitro. As shown in Fig. 4, the morphology of follicles  
235 from *Prmt5<sup>flox/flox</sup>;Sf1-cre* mice was comparable to that of control follicles at D2.  
236 Proliferation of granulosa cells in control follicles was observed at D4, and the  
237 follicles developed to the preovulatory stage with multiple layers of granulosa cells  
238 after 9 days of culture (A-C, G-H). The granulosa cells were detached from oocytes in  
239 *Prmt5<sup>flox/flox</sup>;Sf1-cre* follicles at D4 (E, and a magnified view in L), and no colonized  
240 granulosa cells were observed after 9 days of culture (D-F, J-K). Most of the  
241 granulosa cells were attached to the culture dishes just like the interstitial cells, and  
242 denuded oocytes were observed after 3 days of culture (E-F, J-K, and a magnified

243 view in L).

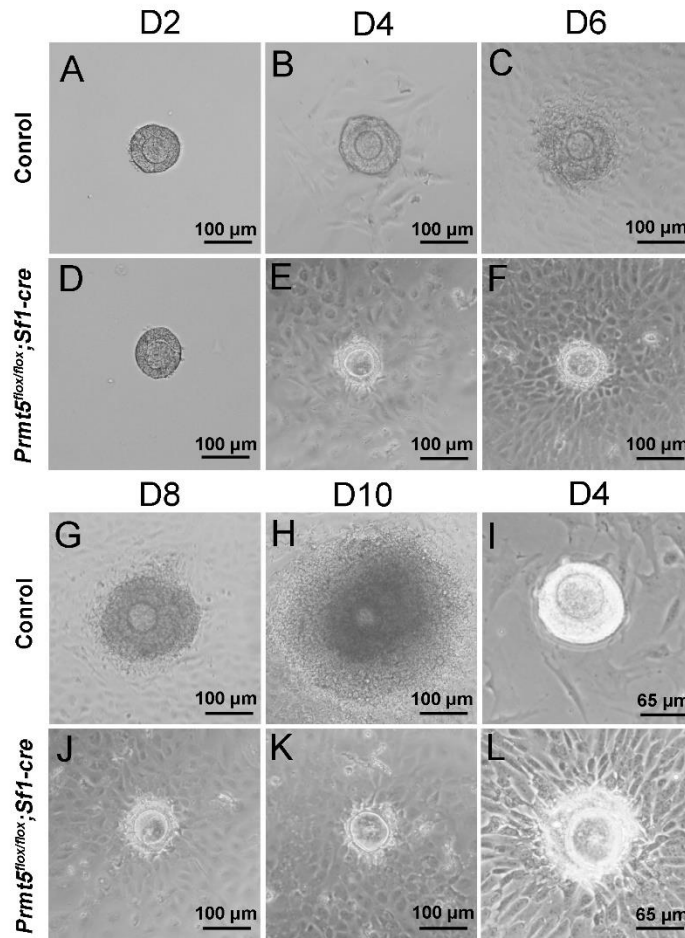

244

245 **Figure 4. Aberrant development of in vitro-cultured *Prmt5<sup>flox/flox</sup>; Sfl1-cre* follicles.** Follicles  
246 with 2-3 layers of granulosa cells isolated from control and *Prmt5<sup>flox/flox</sup>; Sfl1-cre* mice were  
247 cultured in vitro. After 9 days of culture, control follicles grew significantly and developed to the  
248 preovulatory stage (A-C, G-H). No obvious layers of granulosa cells were observed around  
249 oocytes (D-F, J-K), and the granulosa cells extended away from the oocytes and adhered to the  
250 dish (L). I and L are two magnified views of cultured follicles at day 4.

251

252 To further verify the differential expression of granulosa cell-specific and  
253 steroidogenic genes in *Prmt5*-deficient granulosa cells, granulosa cells were isolated  
254 at P18, and gene expression was analyzed by Western blot and real-time PCR  
255 analyses. As shown in Fig. 5 (A, B), the protein levels of PRMT5 and its interacting  
256 partner MEP50 were decreased dramatically in *Prmt5<sup>flox/flox</sup>; Sfl1-cre* granulosa cells, as

257 expected. The protein level of WT1 was significantly reduced in *Prmt5*-deficient  
258 granulosa cells. Surprisingly, the mRNA level of *Wt1* was not changed in  
259 *Prmt5*-deficient granulosa cells (C). FOXL2 expression was also decreased, but the  
260 difference was not significant. The expression of the steroidogenic genes CYP11A1,  
261 StAR and NR5A1 was significantly increased in *Prmt5*-deficient granulosa cells,  
262 consistent with the immunostaining results. Their mRNA levels were also  
263 significantly increased (C). We also examined the functions of PRMT5 by treating  
264 granulosa cells with the PRMT5-specific inhibitor EPZ015666. The protein level of  
265 WT1 was significantly reduced after EPZ015666 treatment, whereas the mRNA level  
266 was not changed. The expression of steroidogenic genes was significantly increased at  
267 both the protein and mRNA levels after EPZ015666 treatment (Fig. 5D, E, F). These  
268 results were consistent with those in *Prmt5*-deficient granulosa cells, indicating the  
269 effect of PRMT5 on granulosa cells was dependent on its methyltransferase activity.  
270 These results suggest that PRMT5 is required for maintenance of granulosa cell  
271 identity and that inactivation of this gene causes granulosa cell-to-steroidogenic cell  
272 transformation.

273

274

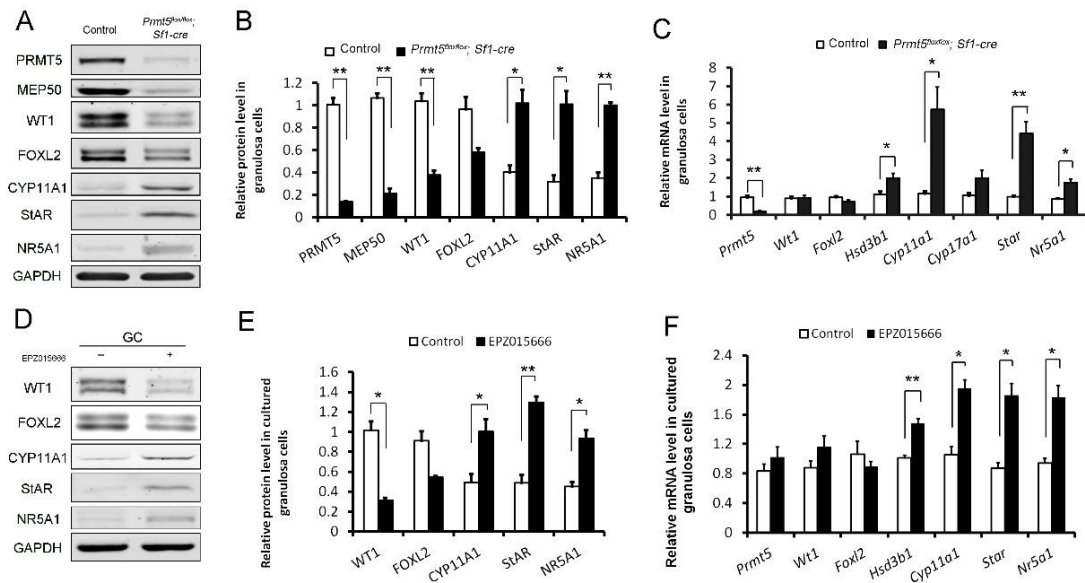

275

276 **Figure 5. Differentially expressed genes in *Prmt5*-deficient granulosa cells.** Western blot (A  
 277 and B) and real-time PCR analyses (C) of the indicated genes in granulosa cells isolated from  
 278 control or *Prmt5<sup>lox/lox</sup>;Sfl-cre* ovaries at P18. Western blot (D and E) and real-time PCR analyses  
 279 (F) of the indicated genes in granulosa cells treated with DMSO or EPZ015666 (5 $\mu$ M) for 5 days.  
 280 The protein expression in Western blot analysis was quantified and normalized to that of GAPDH  
 281 (B and E). The data are presented as the mean $\pm$ SEM. For B,E,F, n=3; For C, n=5. \*, P < 0.05. \*\*,  
 282 P < 0.01.

283

284 *The expression of WT1 was regulated by PRMT5 at the translational level*

285 PRMT5 has been reported to regulate the translation of several genes in an  
 286 IRES-dependent manner<sup>17,18</sup>. Internal ribosome entry sites (IRESs) are secondary  
 287 structures in the 5'UTR that directly recruit the ribosome cap independently and  
 288 initiate translation without cap binding and ribosome scanning<sup>19-21</sup>. *Wt1* 5'UTR is  
 289 268bp, GC-rich (68%) and contains 7 CUG codons and 1 AUG codon. These features  
 290 usually act as strong barriers for ribosome scanning and conventional translation  
 291 initiation. Translation initiation in a number of these mRNAs is achieved via  
 292 IRES-mediated mechanisms<sup>21</sup>. To test whether the *Wt1* 5'UTR contains an IRES  
 293 element, we utilized a pRF dicistronic reporter construct in which upstream Renilla

294 luciferase is translated cap-dependently, whereas downstream firefly luciferase is not  
295 translated unless a functional IRES is present. A stable hairpin structure upstream of  
296 Renilla luciferase minimizes cap-dependent translation<sup>19</sup> (Fig. 6A). *Wtl* 5'UTR was  
297 inserted into the intercistronic region between Renilla and firefly luciferase (named  
298 pRWT1F), and primary granulosa cells were transfected with pRF or pRWT1F. The  
299 firefly/Renilla luciferase activity ratio was analyzed 48 hours later. As shown in Fig.  
300 6B, the firefly/Renilla luciferase activity ratio was dramatically increased in  
301 pRWT1F-transfected cells compared to pRF-transfected cells. In contrast, the  
302 firefly/Renilla luciferase activity ratio was not increased when *Wtl* 5'UTR was  
303 inserted in the reverse direction (pRWT1-RevF) (Fig. 6B). The luciferase activity was  
304 dramatically increased with insertion of *Ccnd1* 5'UTR as a positive control, which  
305 has been reported to contain an IRES element in the 5'UTR<sup>22</sup>. These results suggest  
306 that *Wtl* 5'UTR probably contains an IRES element.

307 To verify that firefly luciferase protein was synthesized by translation of an  
308 intact dicistronic transcript instead of a monocistronic mRNA generated by cryptic  
309 splicing or promoter within the dicistronic gene<sup>23</sup>, mRNA from pRF- or  
310 pRWT1F-transfected cells was treated with DNase, reverse-transcribed, and then  
311 amplified with primers binding to the 5' end of Renilla luciferase and 3' end of firefly  
312 luciferase open reading frame spanning the whole transcript. Only one band was  
313 detected in both cells with the expected molecular weight (Fig. S5A). Moreover,  
314 qPCR analysis of firefly and Renilla luciferase mRNA levels also showed that the  
315 firefly/Renilla luciferase mRNA ratio was not different between pRF- and



316 pRWT1F-transfected cells (Fig. S5B), further excluding the possibility that insertion  
 317 of the *Wtl* 5'UTR into pRF generated a monocistronic firefly ORF.

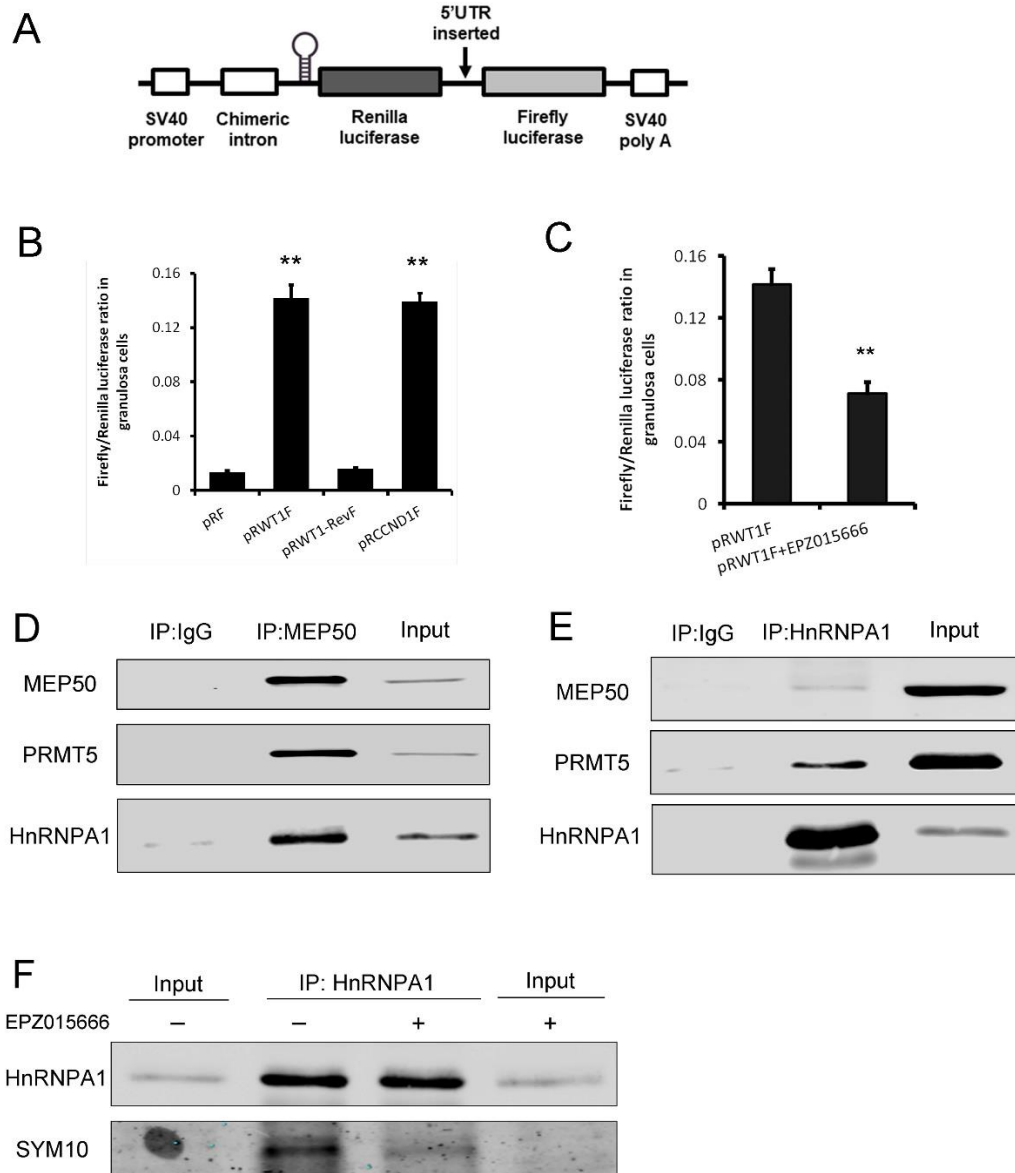

318  
 319 **Figure 6. PRMT5 regulated translation of *Wtl* mRNA by inducing IRES activity in the**  
 320 **5'UTR.** A, Schematic representation of the dicistronic reporter construct. B, *Wtl* 5'UTR has IRES  
 321 activity. Cultured primary granulosa cells were transfected with pRF, pRWT1F (pRF with the *Wtl*  
 322 5'UTR inserted), pRWT1-RevF (pRF with the *Wtl* 5'UTR inserted in reverse orientation), or  
 323 pRCCND1F (pRF with the *Ccnd1* 5'UTR inserted). The firefly and Renilla luciferase activities  
 324 were measured 24 hours later, and the ratios of firefly luciferase activity to Renilla luciferase  
 325 activity were calculated. C, Luciferase activity was decreased in primary granulosa cells treated  
 326 with the PRMT5 inhibitor EPZ015666. Isolated granulosa cells were treated with DMSO or  
 327 EPZ015666 for 4 days. The day granulosa cells were isolated was denoted as day 1. On day 4,  
 328 granulosa cells were transfected with pRWT1F. Twenty-four hours later, the cells were harvested

329 for luciferase activity analysis. The ratios of firefly luciferase activity to Renilla luciferase activity  
330 were calculated. In A-C, the data are presented as the mean $\pm$ SEM, n=4. \*\*, P < 0.01. D,  
331 HnRNPA1 was pulled down with an antibody against the PRMT5-associated protein MEP50. E,  
332 PRMT5 and MEP50 were pulled down by an HnRNPA1 antibody. F, The symmetric  
333 dimethylation of HnRNPA1 was decreased after EPZ015666 treatment in primary granulosa cells.

334

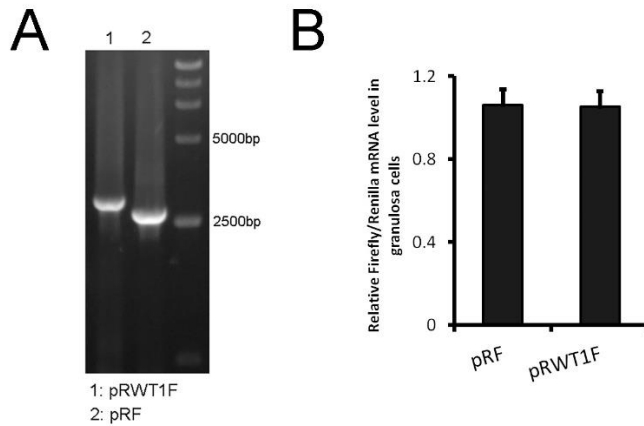

335

336

337 **Figure S5. The increased luciferase activity of pRWT1F was not due to a monocistronic**  
338 **firefly ORF generated by cryptic splicing or promoter within the dicistronic gene.** A, Primary  
339 granulosa cells were transfected with pRF or pRWT1F plasmids. RNA was isolated,  
340 DNase-treated, reverse-transcribed, and amplified using PCR primers that bind to the 5' end of  
341 Renilla luciferase and the 3' end of the firefly luciferase sequence (A) or processed for real-time  
342 PCR assays to analyze firefly and Renilla luciferase mRNA levels (B). The expression of firefly  
343 luciferase mRNA was normalized to that of Renilla luciferase mRNA. The data are presented as  
344 the mean  $\pm$  SEM, n=3.

345

346 To investigate the effect of PRMT5 on *Wtl* IRES activity, granulosa cells were  
347 treated with EPZ015666 for 4 days, we found *Wtl* IRES activity was decreased  
348 significantly by EPZ015666 (Fig. 6C). These results indicate that PRMT5 regulates  
349 *Wtl* expression at the translational level through inducing its IRES activity in  
350 granulosa cells.

351

352 *Wtl* IRES activity was regulated by PRMT5 through methylation of HnRNPA1

353 IRES-mediated translation depends on IRES *trans*-acting factors (ITAFs), which

354 function by associating with the IRES and either facilitate the assembly of initiation  
355 complexes or alter the structure of the IRES<sup>23,24</sup>. Heterogeneous nuclear  
356 ribonucleoprotein A1 (HnRNPA1) is a well-studied RNA binding protein that plays  
357 important roles in pre-mRNA and mRNA metabolism<sup>25</sup>. HnRNPA1 is also an ITAF  
358 that has been reported to regulate the IRES-dependent translation of many genes, such  
359 as *Ccnd1*, *Apaf1*<sup>26</sup>, *Myc*<sup>24</sup>, *Fgf2*<sup>27</sup>, and *Xiap*<sup>28,29</sup>. HnRNPA1 can be methylated by  
360 PRMT1<sup>28</sup> or PRMT5<sup>17,18</sup>, which regulates the ITAF activity of HnRNPA1. To test  
361 whether PRMT5 interacts with HnRNPA1 in granulosa cells, coimmunoprecipitation  
362 experiments were conducted. We found that HnRNPA1 and PRMT5 were pulled  
363 down by antibody against the PRMT5 main binding partner MEP50 (Fig. 6D).  
364 Conversely, PRMT5 and MEP50 could be pulled down by the HnRNPA1 antibody  
365 (Fig. 6E). We also found that the level of symmetric dimethylation of HnRNPA1 was  
366 significantly reduced with EPZ015666 treatment in granulosa cells (Fig. 6F).

367 To test whether HnRNPA1 functions during PRMT5-mediated *Wt1* translation,  
368 HnRNPA1 was knocked down in granulosa cells via siRNA transfection. Western blot  
369 analysis results showed that HnRNPA1 protein levels were significantly decreased  
370 with siRNA transfection (Fig. 7A). We found that WT1 protein level was increased  
371 significantly in granulosa cells after knockdown of HnRNPA1. The decreased WT1  
372 expression in EPZ015666-treated granulosa cells was partially reversed by  
373 knockdown of HnRNPA1 (Fig. 7A). The luciferase activity of pRWT1F was increased  
374 in granulosa cells with HnRNPA1 siRNA treatment and decreased in those with  
375 EPZ015666 treatment. The decreased luciferase activity in EPZ015666-treated

376 granulosa cells was partially reversed by knockdown of HnRNPA1 (Fig. 7B). To  
377 further confirm the effect of HnRNPA1 on *Wtl* IRES activity, HnRNPA1 was  
378 overexpressed in granulosa cells, and we found that *Wtl* IRES activity was  
379 significantly decreased (Fig. 7D). These results indicated that as an ITAF, the effect of  
380 HnRNPA1 on *Wtl* IRES activity was repressive.

381       There are five arginine residues in the HnRNPA1 glycine/arginine-rich (GAR)  
382 motif, which can be symmetrically or asymmetrically dimethylated by PRMT5<sup>17</sup> or  
383 PRMT1<sup>28,30</sup>, respectively. R206, R218, R225 and R232 are required for HnRNPA1  
384 ITAF activity<sup>17,28</sup>. To determine the role of HnRNPA1 arginine methylation in *Wtl*  
385 IRES activity, the four arginine residues were mutated to lysines (Fig. 7C), and  
386 flag-tagged HnRNPA1 or mutant plasmids were cotransfected with pRWT1F into  
387 granulosa cells. We found that *Wtl* IRES activity was further decreased in granulosa  
388 cells overexpressing mutant HnRNPA1 compared to those overexpressing wild-type  
389 HnRNPA1 (Fig. 7D). However, the difference in *Wtl* IRES activity between cells  
390 overexpressing mutant HnRNPA1 and cells overexpressing wild-type HnRNPA1  
391 disappeared when the granulosa cells were treated with EPZ015666 (Fig. 7D). These  
392 results indicate that the repressive function of HnRNPA1 on *Wtl* IRES activity is  
393 inhibited by PRMT5-mediated arginine symmetric dimethylation.

394

395

396

397

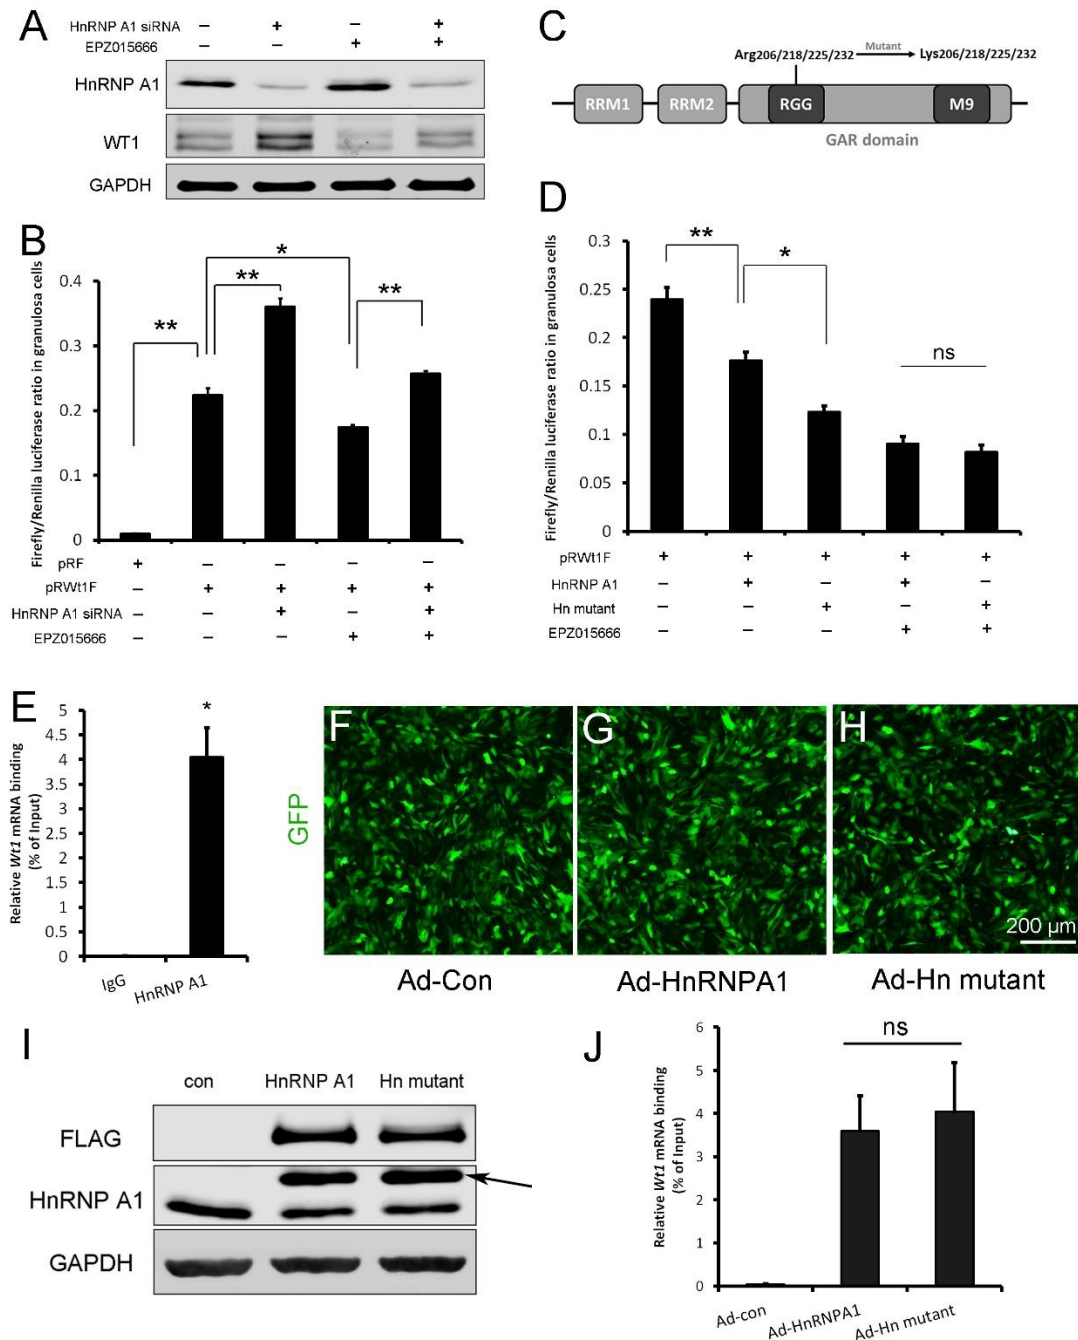

398

399 **Figure 7. *Wt1* IRES activity is regulated by PRMT5 via methylation of HnRNP A1.** A,  
 400 Western blot analysis of HnRNP A1 and WT1 in granulosa cells after HnRNP A1 siRNA  
 401 transfection or EPZ015666 treatment. B, Luciferase activity analysis of pRWT1F in granulosa  
 402 cells after HnRNP A1 siRNA transfection or EPZ015666 treatment. Isolated granulosa cells were  
 403 treated with DMSO or EPZ015666 for 4 days. The day granulosa cells isolated was denoted as  
 404 day 1. On day 2, cells were transfected with control siRNA or siRNA to HnRNP A1. 48h later,  
 405 pRF or pRWT1F were transfected. The luciferase activity of pRWT1F was calculated as the ratio  
 406 of firefly luciferase activity to Renilla luciferase activity. C, Schematic diagram of HnRNP A1  
 407 protein domains. HnRNP A1 contains two RRM (RNA recognition motifs). The  
 408 glycine/arginine-rich (GAR) domain contains an RGG (Arg-Gly-Gly) box and a nuclear targeting  
 409 sequence (M9). Four arginine residues within the RGG motif were mutated to lysine. D,

410 Luciferase activity analysis of pRWT1F in granulosa cells after EPZ015666 treatment or  
411 overexpressing HnRNPA1 or arginine-mutated HnRNPA1. Isolated granulosa cells were treated  
412 with DMSO or EPZ015666 for 4 days. On day 3, flag-tagged HnRNPA1 or mutant plasmids were  
413 cotransfected with pRWT1F into granulosa cells. 48h later, cells were harvested for luciferase  
414 activity analysis. E, RNA immunoprecipitation was conducted in granulosa cells using an  
415 HnRNPA1 antibody, and the *Wtl* mRNA pulled down by HnRNPA1 was analyzed with real-time  
416 PCR. F-H, Primary granulosa cells were cultured and infected with control, flag-tagged HnRNPA1,  
417 or mutant HnRNPA1 (Ad-Hn mutant) adenoviruses. The expression of control and mutant  
418 HnRNPA1 was examined by Western blot analysis (I). J, RNA immunoprecipitation was  
419 conducted using a FLAG antibody, and *Wtl* mRNA pulled down by control or mutant HnRNPA1  
420 protein was analyzed with real-time PCR. For B, D (n=4) and E, J (n=3), the data are presented as  
421 the mean±SEM. \*, P < 0.05. \*\*, P < 0.01.

422

423 To test the interaction between HnRNPA1 and *Wtl* mRNA, RNA  
424 immunoprecipitation was performed with an HnRNPA1 antibody in primary  
425 granulosa cells. As shown in Fig. 7E, *Wtl* mRNA was pulled down by the HnRNPA1  
426 antibody in granulosa cells. Next, granulosa cells were infected with flag-tagged  
427 wild-type or arginine-mutant HnRNPA1 adenovirus (Fig. 7F-I) and RNA  
428 immunoprecipitation was conducted with an FLAG antibody. The results showed that  
429 mutation of arginines did not affect the interaction between HnRNPA1 and *Wtl*  
430 mRNA (Fig. 7J).

431

432 *The upregulation of steroidogenic genes in Prmt5<sup>lox/lox</sup>;Sfl-cre granulosa cells was*  
433 *repressed by Wtl overexpression.*

434 To test whether the upregulation of steroidogenic genes in *Prmt5*-deficient  
435 granulosa cells is due to downregulation of WT1, granulosa cells from  
436 *Prmt5<sup>lox/lox</sup>;Sfl-cre* mice were infected with control or GFP-tagged WT1-expressing  
437 adenovirus (Fig. 8A, B). *Wtl* protein (Fig. 8D arrow, E) and mRNA (Fig. 8C) levels

438 were dramatically increased in *Prmt5*-deficient granulosa cells after *Wt1*  
 439 overexpression. We found the expression of steroidogenic genes was significantly  
 440 decreased in these cells. These results suggest that the aberrant differentiation of  
 441 *Prmt5*-deficient granulosa cells can be rescued by WT1.  
 442

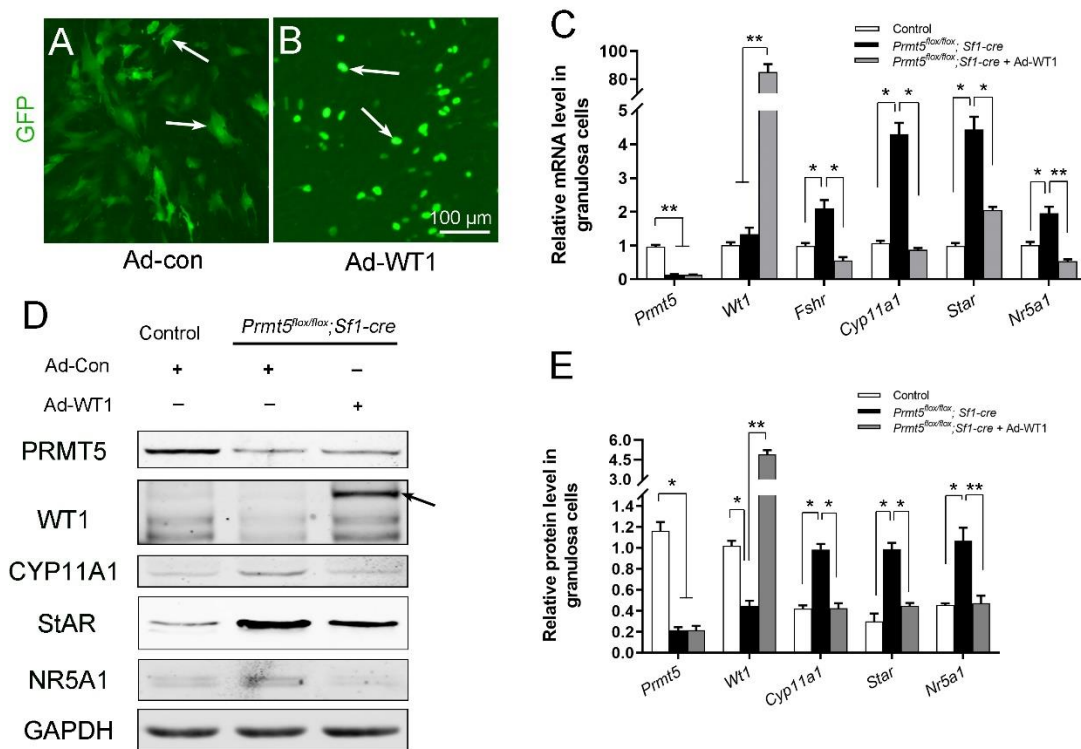

443  
 444  
 445 **Figure 8. The upregulation of steroidogenic genes in *Prmt5<sup>flax/flax</sup>;Sf1-cre* granulosa cells was**  
 446 **reversed by *Wt1* overexpression.** A, B, Granulosa cells isolated from control and  
 447 *Prmt5<sup>flax/flax</sup>;Sf1-cre* mice were cultured and infected with control or GFP-fused *Wt1* adenovirus.  
 448 The expression of steroidogenic genes was examined by RT-qPCR (C) and Western blot analysis  
 449 (D). The protein expression in Western blot analysis was quantified and normalized to that of  
 450 GAPDH (E). C,E, the data are presented as the mean  $\pm$  SEM (n=3). \*, P < 0.05. \*\*, P < 0.01.

451

## 452 Discussion

453 Protein arginine methylation is one of the most important epigenetic  
 454 modifications and is involved in many cellular processes. It has been demonstrated

455 that PRMT5 is required for germ cell survival. In this study, we found that protein  
456 arginine methylation plays important roles in granulosa cell development. The  
457 development of ovarian follicles is a dynamic process. With follicle development, the  
458 morphology and gene expression of granulosa cells are changed. When primordial  
459 follicles are activated to grow, the flattened granulosa cells become more epithelial  
460 through processes such as cuboidalization and polarization in primary follicles. The  
461 granulosa cells in antral follicles express gonadotropin receptors. Before ovulation,  
462 granulosa cells begin to express steroidogenic enzymes that are necessary for  
463 progesterone and estradiol synthesis<sup>6,31</sup>. WT1 is expressed at high levels in granulosa  
464 cells of primordial, primary, and secondary follicles but decreases with follicle  
465 development, suggesting it might be a repressor of ovarian differentiation genes in the  
466 granulosa cells<sup>7</sup>. Our previous study demonstrated that the *Wtl* gene is required for  
467 lineage specification and maintenance of granulosa cells<sup>8,9</sup>. Inactivation of *Wtl* causes  
468 the transformation of pregranulosa cells to steroidogenic cells. In this study, we found  
469 *Prmt5*-deficient granulosa cells began to express steroidogenic genes in secondary  
470 follicles and the upregulation of the steroidogenic genes in *Prmt5*-deficient granulosa  
471 cells was reversed by *Wtl* overexpression, indicating that PRMT5 is required for  
472 preventing the premature differentiation of granulosa cells via regulation of WT1  
473 expression. Coordinated interaction between granulosa cells and oocytes is required  
474 for successful follicle development and production of fertilizable oocytes. The  
475 premature luteinized granulosa cells will lose their structural and nutritional support  
476 for oocytes which will lead to follicle growth arrest or atresia at early stages of



477 folliculogenesis.

478 Our previous study demonstrated that WT1 represses *Sfl* expression by directly  
479 binding to the *Sfl* promoter region and that inactivation of *Wtl* causes upregulation of  
480 *Sfl*, which in turn activates the steroidogenic program<sup>8</sup>. In the present study, the  
481 mRNA and protein levels of *Sfl* were significantly upregulated after WT1 loss;  
482 therefore, the upregulation of steroidogenic genes in *Prmt5*-deficient granulosa cells  
483 is due to the increased expression of *Sfl*.

484 As an important nuclear transcription factor, the function of WT1 in granulosa  
485 cell development has been investigated. However, the molecular mechanism that  
486 regulates the expression of this gene is unknown. In this study, we found that the  
487 expression of WT1 at the protein level was dramatically reduced in *Prmt5*-deficient  
488 granulosa cells, whereas the mRNA level was not changed, indicating that PRMT5  
489 regulates *Wtl* expression at the posttranscriptional level. In our mouse model, *Prmt5*  
490 was inactivated in granulosa cells at the early embryonic stage. However, defects in  
491 follicle development were not observed until 2 weeks after birth. Follicle development  
492 was arrested. This outcome probably occurred because *Prmt5* is not expressed in  
493 granulosa cells before the development of primary follicles (Fig. S1). During the early  
494 stage, *Wtl* expression is also maintained in pre-granulosa cells, therefore, we  
495 speculate there must be another factor(s) regulating *Wtl* expression before primary  
496 follicle stage.

497 More than 100 mRNAs in mammals contain IRES elements in their 5'UTRs<sup>32</sup>,  
498 which are involved in various physiological processes, such as differentiation, cell

499 cycle progression, apoptosis and stress responses<sup>33</sup>. The 5'UTR sequence of *Wtl*  
500 mRNA is highly conserved, with more than 85% homology among the sequences of  
501 29 mammalian species. Our study indicates that the *Wtl* 5'UTR has IRES activity.  
502 HnRNPA1 belongs to the HnRNP family, which comprises at least 20 members  
503 associated with RNA processing, splicing, transport and metabolism<sup>33,34</sup>. As a main  
504 ITAF, HnRNPA1 either activates the translation of *Fgf2*<sup>27</sup>, *Srebp-1a*<sup>35</sup>, and *Ccnd1*<sup>22</sup> or  
505 inhibits the translation of *Xiap*<sup>29</sup>, *Apaf*<sup>26</sup>, and *Bcl-xl*<sup>36</sup>. The underlying mechanism by  
506 which HnRNPA1 activates some IRESs but suppresses other IRESs is still unknown.  
507 HnRNPA1 may compete with other ITAFs for binding or may modify IRES structure  
508 and thus regulate IRES activity<sup>26,29</sup>.

509 It has been reported that the expression of several genes is regulated by PRMT5  
510 at the protein level<sup>17,37</sup>. *Gao et al.* reported that PRMT5 regulates IRES-dependent  
511 translation via methylation of HnRNPA1 in the 293T and MCF-7 cell lines. They  
512 found that HnRNPA1 activates the IRES-dependent translation and that methylation  
513 of HnRNPA1 facilitates the interaction of HnRNPA1 with IRES mRNA to promote  
514 translation<sup>17</sup>. In the present study, we found that *Wtl* IRES activity was repressed by  
515 HnRNPA1 (Fig. 9A) and that the repressive effect of HnRNPA1 was reversed by  
516 PRMT5-mediated arginine methylation; thus, *Wtl* IRES-dependent translation was  
517 promoted by PRMT5 (Fig. 9B).

518

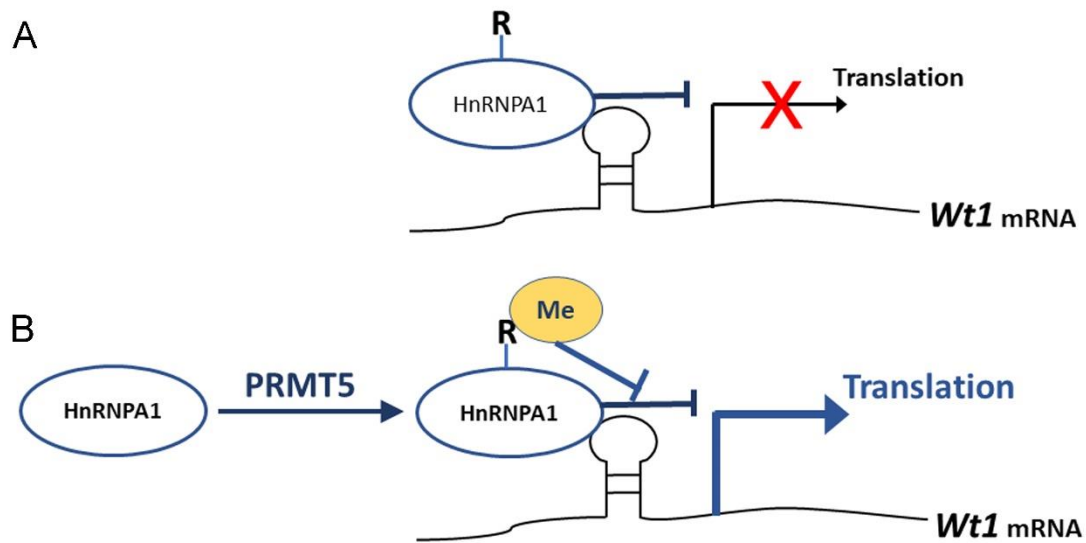

519

520

521 **Figure 9. Schematic illustration of how PRMT5 regulates *Wt1* mRNA translation.** A, As an  
522 ITAF, HnRNPA1 binds to *Wt1* mRNA and inhibits the IRES-dependent translation of *Wt1*. B,  
523 PRMT5 catalyzes symmetric methylation of HnRNPA1, which suppresses the ITAF activity of  
524 HnRNPA1 and promotes the translation of *Wt1* mRNA. R, arginine. Me, methylation.

525

526 The ITAF activity of HnRNPA1 can be regulated by posttranslational  
527 modifications<sup>33</sup>. Phosphorylation of HnRNPA1 on serine 199 by Akt inhibits  
528 IRES-dependent translation of *c-myc* and *cyclin D1*<sup>22,24</sup>. Symmetric dimethylation of  
529 HnRNPA1 by PRMT5 enhances HnRNPA1 ITAF activity and promotes the  
530 translation of target mRNAs<sup>17</sup>. Asymmetric dimethylation of HnRNPA1 by PRMT1  
531 inhibits its ITAF activity<sup>28</sup>. These results suggest that arginine methylation has  
532 different effects on the ITAF activity of HnRNPA1 according to different IRESs and  
533 cell contexts. Our study demonstrated that HnRNPA1 ITAF activity toward *Wt1*  
534 mRNA was repressed by PRMT5-mediated arginine methylation. However, the  
535 affinity between HnRNPA1 and *Wt1* mRNA was not affected after mutation of  
536 arginine residues, consistent with the findings of a previous study<sup>28</sup>. Therefore, the

537 inhibition of HnRNPA1 ITAF activity by PRMT5 does not occur through changes in  
538 the binding of HnRNPA1 to *Wt1* mRNA. The underlying mechanism needs further  
539 investigation.

540 Epigenetic modification is involved in numerous cellular processes. However,  
541 the functions of epigenetic modification in granulosa cell development have not been  
542 well studied. In this study, we demonstrated that *Prmt5* is required for maintenance of  
543 granulosa cell identity in follicle development and that inactivation of *Prmt5* causes  
544 premature luteinization of granulosa cells. Our study also demonstrates that PRMT5  
545 regulates WT1 expression at the translational level by methylating HnRNPA1. This  
546 study provides very important information for better understanding the regulation of  
547 gonad somatic cell differentiation.

548

## 549 **Materials and Methods**

### 550 *Mice*

551 All animal experiments were carried out in accordance with the protocols  
552 approved by the Institutional Animal Care and Use Committee at the Institute of  
553 Zoology, Chinese Academy of Sciences (CAS). All mice were maintained on a  
554 C57BL/6;129/SvEv mixed background. *Prmt5<sup>flox/flox</sup>; Sfl-cre* female mice were  
555 obtained by crossing *Prmt5<sup>flox/flox</sup>* mice with *Prmt5<sup>+flox</sup>; Sfl-cre* mice. *Prmt5<sup>flox/flox</sup>* and  
556 *Prmt5<sup>+flox</sup>* female mice were used as controls.

557

### 558 *Plasmid and adenovirus*

559 The dicistronic construct pRF was a generous gift from Professor Anne Willis,  
560 University of Cambridge. pRWT1F, pRCCND1F and pRWT1-RevF were constructed  
561 by inserting the mouse *Wt1* 5'UTR, human *Ccnd1* 5'UTR or mouse *Wt1* 5'UTR in  
562 reverse orientation into EcoRI and NcoI sites of the pRF vector. Mouse *Wt1* 5'UTR  
563 and human *Ccnd1* 5'UTR sequence were amplified by PCR and the primers used  
564 were: pRWT1F-F: CCGGAATTCTGTGTGAATGGAGCGGCCGAGCAT,  
565 pRWT1F-R: CTAGCCATGGGATCGCGGCGAGGAGGCG; pRWT1-RevF-F:  
566 CTAGCCATGGTGTGTGAATGGAGCGGCCGAGCAT, pRWT1-RevF-R:  
567 CCGGAATTCGATCGCGGCGAGGAGGCG; pRCCND1F-F:  
568 GCTGAATTCCACACGGACTACAGGGGAGTTTT, pRCCND1F-R:  
569 CGGCCATGGGGCTGGGGCTCTTCCTGGGC. The primers amplifying the whole  
570 transcript of pRF binding to the 5' end of renilla and 3' end of firefly ORF: pRF-F:  
571 GCCACCATGACTTCGAAAGTTTATGA; pRF-R: TTACACGGCGATCTTTCCGC.  
572 FLAG-tagged HnRNPA1 and mutant plasmids were generated by inserting the coding  
573 sequence and a mutant sequence of mouse HnRNPA1, respectively, into NheI and  
574 BamHI sites of the pDC316-mCMV-ZsGreen-C-FLAG vector. HnRNPA1-F:  
575 CTAGCTAGCCACCATGTCTAAGTCCGAGTCTCCCAAGGA, HnRNPA1-R:  
576 CGCGGATCCGAACCTCCTGCCACTGCCATAGCTA. Adenoviruses containing  
577 WT1 coding sequence, HnRNPA1 or the mutant sequence were generated using the  
578 Gateway Expression System (Invitrogen).

579

580 *Isolation of granulosa cells, transient transfection, infection and luciferase assay*

581 Granulosa cells were isolated from mice at 16-18 days old. After mechanical  
582 dissection, ovaries were cut into several parts and incubated in PBS containing 1  
583 mg/ml collagenase IV (Sigma) in a water bath with circular agitation (85 rpm) for 5  
584 min at 37°C. Follicles were allowed to settle and washed in PBS. The supernatant  
585 were discarded. A second enzyme digestion was performed in PBS containing 1  
586 mg/ml collagenase IV, 1 mg/ml Hyaluronidase, 0.25% Trypsin, and 1mg/ml DNase I  
587 (Applichem) for 15min. FBS was added to stop the digestion and cell suspension was  
588 filtered through a 40- $\mu$ m filter. Cells were centrifuged, washed and then plated in  
589 24-well plate in DMEM/F12 supplemented with 5% FBS. For EPZ015666 treatment,  
590 granulosa cells were incubated in the medium with the addition of 5 $\mu$ M EPZ015666  
591 (MedChemExpress) for 4-5 days. When cells were approximately 70% confluent,  
592 granulosa cells were transfected with plasmids or infected with adenovirus according  
593 to the experiments. At the end of culture, cells were lysed for RT-qPCR, Western blot  
594 analysis, or luciferase activity analysis using a dual luciferase reporter assay system  
595 (Promega).

596 Control siRNA or siRNA to HnRNPA1 was purchased from ThermoFisher  
597 (S67643, S67644) and transfected into granulosa cells with Lipofectamine 3000  
598 transfection reagent without P3000. 48 hours later, pRF or pRWT1F were transfected  
599 and luciferase activities were measured the following day.

600

#### 601 *In vitro ovarian follicle culture*

602 Follicles were dissected and cultured as previously described<sup>38</sup>. Briefly, ovaries

603 of 14-day-old mice were dissected aseptically using the beveled edges of two syringe  
604 needles. Follicles with 2–3 layers of granulosa cells, a centrally placed oocyte, an  
605 intact basal membrane and attached theca cells were selected and cultured  
606 individually in 20  $\mu$ l droplets of culture medium ( $\alpha$ MEM supplemented with 5% FBS,  
607 1% ITS and 100 mIU/ml recombinant FSH). The culture were maintained in 37°C  
608 and 5% CO<sub>2</sub> in air. The medium was replaced every other day. The morphology of the  
609 follicles was recorded daily under a microscope.

610

#### 611 *Co-immunoprecipitation*

612 Granulosa cells isolated from mice at 16-18 days old were cultured in 10-cm  
613 dishes and lysed with lysis buffer (50mM Tris·HCl (pH 7.5), 150 mM NaCl, 1mM  
614 EDTA, 1% Nonidet P-40) supplemented with protease inhibitors cocktail (Roche) and  
615 1mM PMSF. One milligram of protein were first pre-cleared with protein G agarose  
616 beads (GE) for 1 hour at 4°C, then incubated with 1.5 $\mu$ g of IgG (mouse, Santa Cruz,  
617 sc-2025; rabbit, Abmart, B30011S), HnRNPA1 antibody (Abcam, ab5832), or MEP50  
618 antibody (Abcam, ab154190) for 4 hours at 4°C. Then protein A and G agarose beads  
619 were added and incubated overnight. The immunoprecipitates were washed 4 times in  
620 lysis buffer supplemented with cocktail and PMSF, resolved in loading buffer,  
621 incubated for 5 min at 95°C, and then analyzed by Western blotting. The antibodies  
622 used in Western blotting include: PRMT5 (Millipore, 07-405), SYM10 (Millipore,  
623 07-412), HnRNPA1 (Abcam, ab5832), MEP50 (Abcam, ab154190).

624

625 *Western blot analysis*

626 Granulosa cells were washed with PBS, lysed with RIPA buffer (50 mM Tris–  
627 HCl (pH 7.5), 150 mM NaCl, 1% NP-40, 0.1% SDS, 1% sodium deoxycholate, 5mM  
628 EDTA) supplemented with protease inhibitors cocktail (Roche) and 1mM PMSF.  
629 30µg total protein was separated by SDS/PAGE gels, transferred to nitrocellulose  
630 membrane, probed with the primary antibodies. The images were captured with the  
631 ODYSSEY Sa Infrared Imaging System (LI-COR Biosciences, Lincoln, NE, USA).  
632 The antibodies used were: PRMT5 (Millipore, 07-405), MEP50 (Abcam, ab154190),  
633 WT1 (Abcam, ab89901), FOXL2 (Abcam, ab5096), CYP11A1 (Proteintech,  
634 13363-1-AP), StAR (Santa Cruz, sc-25806), SF1 (Proteintech, 18658-1-AP), FLAG  
635 (Sigma, F1804).

636

637 *RNA immunoprecipitation*

638 Granulosa cells were isolated from mice at 16-18 days old and cultured in 10-cm  
639 dishes. The cells were then lysed with RIP buffer (50 mM Tris-HCl pH7.5, 150 mM  
640 NaCl, 5mM EDTA, 1% NP-40, 0.5% sodium deoxycholate) supplemented with  
641 protease inhibitor cocktail and 200U/ml RNase inhibitor. 5% of the cell lysate  
642 supernatants were used as the input and the remainings were incubated with 1.5 µg of  
643 IgG (mouse, Santa Cruz, sc-2025), HnRNPA1 antibody (Abcam, ab5832), or FLAG  
644 antibody (Sigma, F1804) for 4 hours at 4°C. Then protein A and G agarose beads were  
645 added to immunoprecipitate the RNA/protein complex. The conjugated beads were  
646 thoroughly washed with lysis buffer (50 mM Tris–HCl pH7.5, 500 mM NaCl, 5mM



647 EDTA, 1% NP-40, 0.5% sodium deoxycholate) supplemented with cocktail and  
648 200U/ml RNase inhibitor. Bound RNA was extracted using a RNeasy Kit and  
649 analyzed with RT-qPCR analysis.

650

#### 651 *Real-time RT-PCR*

652 Total RNA was extracted using a RNeasy Kit (Aidlab, RN28) in accordance with  
653 the manufacturer's instructions. One micrograms of total RNA was used to synthesize  
654 first-strand cDNA (Abm, G592). cDNAs were diluted and used for the template for  
655 real-time SYBR Green assay. *Gapdh* was used as an endogenous control. All gene  
656 expression was quantified relative to *Gapdh* expression. The relative concentration of  
657 the candidate gene expression was calculated using the formula  $2^{-\Delta\Delta CT}$ . Primers used  
658 for the RT-PCR are listed in Table S1.

659

#### 660 *Immunohistochemistry and immunofluorescence analysis*

661 Immunohistochemistry procedures were performed as described previously<sup>39</sup>.  
662 Stained sections were examined with a Nikon microscope, and images were captured  
663 by a Nikon DS-Ri1 CCD camera. For immunofluorescence analysis, the 5- $\mu$ m  
664 sections were incubated with 5% BSA in 0.3% Triton X-100 for 1 hours after  
665 rehydration and antigen retrieval. The sections were then incubated with the primary  
666 antibodies for 1.5 hours and the corresponding FITC-conjugated donkey anti-goat IgG  
667 (1:150, Jackson ImmunoResearch) and Cy<sup>TM</sup>3-conjugated donkey anti-rabbit IgG  
668 (1:300, Jackson ImmunoResearch) for 1 hour at room temperature. The following

669 primary antibodies were used: WT1 (Abcam, ab89901), FOXL2 (Abcam, ab5096),  
670 CYP11A1 (Proteintech, 13363-1-AP), SF1 (Proteintech, 18658-1-AP), 3 $\beta$ -HSD  
671 (Santa Cruz Biotechnology, sc-30820). After being washed three times in PBS, the  
672 nuclei were stained with DAPI. The sections were examined with a confocal laser  
673 scanning microscope (Carl Zeiss Inc., Thornwood, NY).

674

#### 675 *Statistical analysis*

676 All experiments were repeated at least three times. For immunostaining, one  
677 representative picture of similar results from three to five control or *Prmt5*-deficient  
678 ovaries at each time point is presented. The quantitative results are presented as the  
679 mean $\pm$ SEM. Statistical analyses were conducted using GraphPad Prism version 9.0.0.  
680 Unpaired two-tailed Student's t-tests were used for comparison between two groups.  
681 For three or more groups, data were analyzed using one-way ANOVA. P-values <  
682 0.05 were considered to indicate significance.

683

#### 684 **Data availability**

685 Source data for Fig.5, 6, 7, 8 and Fig. S5 have been provided as Supplementary  
686 file 1.

687

#### 688 **Acknowledgments**

689 We thank Prof. Anne Willis (University of Cambridge) for her generous gift of  
690 the dicistronic construct pRF. We thank Prof. Humphrey Hung-Chang Yao

691 (NIEHS/NIH) for the *Sfl-cre* mice. This work was supported by National key R&D  
692 program of China (2018YFC1004200, 2018YFA0107700); Strategic Priority  
693 Research Program of the Chinese Academy of Sciences (XDB19000000); The  
694 National Science Fund for Distinguished Young Scholars (81525011); The National  
695 Natural Science Foundation of China (31970785, 31601193, and 31671496).

696

### 697 **Author contributions**

698 F.G. and M.C. designed the experiments and wrote the manuscript. M.C. and  
699 F.F.D. performed the experiments and analyzed the data. All authors discussed the  
700 results and edited the manuscript. The authors declare that they have no conflict of  
701 interest.

702

### 703 **References**

- 704 1 Monniaux, D. Driving folliculogenesis by the oocyte-somatic cell dialog: Lessons from genetic  
705 models. *Theriogenology* **86**, 41-53, doi:10.1016/j.theriogenology.2016.04.017 (2016).
- 706 2 Richards, J. S. & Pangas, S. A. New insights into ovarian function. *Handb Exp Pharmacol*, 3-27,  
707 doi:10.1007/978-3-642-02062-9\_1 (2010).
- 708 3 Jagarlamudi, K. & Rajkovic, A. Oogenesis: transcriptional regulators and mouse models. *Mol*  
709 *Cell Endocrinol* **356**, 31-39, doi:10.1016/j.mce.2011.07.049 (2012).
- 710 4 Liu, C. F., Liu, C. & Yao, H. H. Building pathways for ovary organogenesis in the mouse embryo.  
711 *Curr Top Dev Biol* **90**, 263-290, doi:10.1016/S0070-2153(10)90007-0 (2010).
- 712 5 Oktem, O. & Urman, B. Understanding follicle growth in vivo. *Hum Reprod* **25**, 2944-2954,

- 713           doi:10.1093/humrep/deq275 (2010).
- 714    6       Smith, P., Wilhelm, D. & Rodgers, R. J. Development of mammalian ovary. *J Endocrinol* **221**,
- 715           R145-161, doi:10.1530/JOE-14-0062 (2014).
- 716    7       Hsu, S. Y. *et al.* Wilms' tumor protein WT1 as an ovarian transcription factor: decreases in
- 717           expression during follicle development and repression of inhibin-alpha gene promoter. *Mol*
- 718           *Endocrinol* **9**, 1356-1366, doi:10.1210/mend.9.10.8544844 (1995).
- 719    8       Chen, M. *et al.* Wt1 directs the lineage specification of sertoli and granulosa cells by
- 720           repressing Sf1 expression. *Development* **144**, 44-53, doi:10.1242/dev.144105 (2017).
- 721    9       Cen, C. *et al.* Inactivation of Wt1 causes pre-granulosa cell to steroidogenic cell
- 722           transformation and defect of ovary development. *Biol Reprod* **103**, 60-69,
- 723           doi:10.1093/biolre/iaaa042 (2020).
- 724    10      Karkhanis, V., Hu, Y. J., Baiocchi, R. A., Imbalzano, A. N. & Sif, S. Versatility of PRMT5-induced
- 725           methylation in growth control and development. *Trends Biochem Sci* **36**, 633-641,
- 726           doi:10.1016/j.tibs.2011.09.001 (2011).
- 727    11      Stopa, N., Krebs, J. E. & Shechter, D. The PRMT5 arginine methyltransferase: many roles in
- 728           development, cancer and beyond. *Cell Mol Life Sci* **72**, 2041-2059,
- 729           doi:10.1007/s00018-015-1847-9 (2015).
- 730    12      Di Lorenzo, A. & Bedford, M. T. Histone arginine methylation. *FEBS Lett* **585**, 2024-2031,
- 731           doi:10.1016/j.febslet.2010.11.010 (2011).
- 732    13      Li, Z. *et al.* The Sm protein methyltransferase PRMT5 is not required for primordial germ cell
- 733           specification in mice. *EMBO J* **34**, 748-758, doi:10.15252/embj.201489319 (2015).
- 734    14      Kim, S. *et al.* PRMT5 protects genomic integrity during global DNA demethylation in

- 735 primordial germ cells and preimplantation embryos. *Mol Cell* **56**, 564-579,  
736 doi:10.1016/j.molcel.2014.10.003 (2014).
- 737 15 Wang, Y. *et al.* Protein arginine methyltransferase 5 (Prmt5) is required for germ cell survival  
738 during mouse embryonic development. *Biol Reprod* **92**, 104,  
739 doi:10.1095/biolreprod.114.127308 (2015).
- 740 16 Ikeda, Y. *et al.* Characterization of the mouse FTZ-F1 gene, which encodes a key regulator of  
741 steroid hydroxylase gene expression. *Mol Endocrinol* **7**, 852-860,  
742 doi:10.1210/mend.7.7.8413309 (1993).
- 743 17 Gao, G., Dhar, S. & Bedford, M. T. PRMT5 regulates IRES-dependent translation via  
744 methylation of hnRNP A1. *Nucleic Acids Res* **45**, 4359-4369, doi:10.1093/nar/gkw1367 (2017).
- 745 18 Holmes, B. *et al.* The protein arginine methyltransferase PRMT5 confers therapeutic  
746 resistance to mTOR inhibition in glioblastoma. *J Neurooncol* **145**, 11-22,  
747 doi:10.1007/s11060-019-03274-0 (2019).
- 748 19 Coldwell, M. J., Mitchell, S. A., Stoneley, M., MacFarlane, M. & Willis, A. E. Initiation of Apaf-1  
749 translation by internal ribosome entry. *Oncogene* **19**, 899-905, doi:10.1038/sj.onc.1203407  
750 (2000).
- 751 20 Baird, S. D., Turcotte, M., Korneluk, R. G. & Holcik, M. Searching for IRES. *RNA* **12**, 1755-1785,  
752 doi:10.1261/rna.157806 (2006).
- 753 21 Stoneley, M. & Willis, A. E. Cellular internal ribosome entry segments: structures, trans-acting  
754 factors and regulation of gene expression. *Oncogene* **23**, 3200-3207,  
755 doi:10.1038/sj.onc.1207551 (2004).
- 756 22 Shi, Y., Sharma, A., Wu, H., Lichtenstein, A. & Gera, J. Cyclin D1 and c-myc internal ribosome

- 757 entry site (IRES)-dependent translation is regulated by AKT activity and enhanced by  
758 rapamycin through a p38 MAPK- and ERK-dependent pathway. *J Biol Chem* **280**, 10964-10973,  
759 doi:10.1074/jbc.M407874200 (2005).
- 760 23 Kunze, M. M. *et al.* sST2 translation is regulated by FGF2 via an hnRNP A1-mediated  
761 IRES-dependent mechanism. *Biochim Biophys Acta* **1859**, 848-859,  
762 doi:10.1016/j.bbagrm.2016.05.005 (2016).
- 763 24 Jo, O. D. *et al.* Heterogeneous nuclear ribonucleoprotein A1 regulates cyclin D1 and c-myc  
764 internal ribosome entry site function through Akt signaling. *J Biol Chem* **283**, 23274-23287,  
765 doi:10.1074/jbc.M801185200 (2008).
- 766 25 Dreyfuss, G., Kim, V. N. & Kataoka, N. Messenger-RNA-binding proteins and the messages  
767 they carry. *Nat Rev Mol Cell Biol* **3**, 195-205, doi:10.1038/nrm760 (2002).
- 768 26 Cammas, A. *et al.* Cytoplasmic relocalization of heterogeneous nuclear ribonucleoprotein A1  
769 controls translation initiation of specific mRNAs. *Mol Biol Cell* **18**, 5048-5059,  
770 doi:10.1091/mbc.e07-06-0603 (2007).
- 771 27 Bonnal, S. *et al.* Heterogeneous nuclear ribonucleoprotein A1 is a novel internal ribosome  
772 entry site trans-acting factor that modulates alternative initiation of translation of the  
773 fibroblast growth factor 2 mRNA. *J Biol Chem* **280**, 4144-4153, doi:10.1074/jbc.M411492200  
774 (2005).
- 775 28 Wall, M. L. & Lewis, S. M. Methylarginines within the RGG-Motif Region of hnRNP A1 Affect  
776 Its IRES Trans-Acting Factor Activity and Are Required for hnRNP A1 Stress Granule  
777 Localization and Formation. *J Mol Biol* **429**, 295-307, doi:10.1016/j.jmb.2016.12.011 (2017).
- 778 29 Lewis, S. M. *et al.* Subcellular relocalization of a trans-acting factor regulates XIAP

- 779 IRES-dependent translation. *Mol Biol Cell* **18**, 1302-1311, doi:10.1091/mbc.e06-06-0515  
780 (2007).
- 781 30 Rajpurohit, R., Lee, S. O., Park, J. O., Paik, W. K. & Kim, S. Enzymatic methylation of  
782 recombinant heterogeneous nuclear RNP protein A1. Dual substrate specificity for  
783 S-adenosylmethionine:histone-arginine N-methyltransferase. *J Biol Chem* **269**, 1075-1082  
784 (1994).
- 785 31 Irving-Rodgers, H. F., Harland, M. L. & Rodgers, R. J. A novel basal lamina matrix of the  
786 stratified epithelium of the ovarian follicle. *Matrix Biol* **23**, 207-217,  
787 doi:10.1016/j.matbio.2004.05.008 (2004).
- 788 32 Jaud, M. *et al.* The PERK Branch of the Unfolded Protein Response Promotes DLL4 Expression  
789 by Activating an Alternative Translation Mechanism. *Cancers (Basel)* **11**,  
790 doi:10.3390/cancers11020142 (2019).
- 791 33 Godet, A. C. *et al.* IRES Trans-Acting Factors, Key Actors of the Stress Response. *Int J Mol Sci*  
792 **20**, doi:10.3390/ijms20040924 (2019).
- 793 34 Roy, R., Huang, Y., Seckl, M. J. & Pardo, O. E. Emerging roles of hnRNPA1 in modulating  
794 malignant transformation. *Wiley Interdiscip Rev RNA* **8**, doi:10.1002/wrna.1431 (2017).
- 795 35 Damiano, F. *et al.* hnRNP A1 mediates the activation of the IRES-dependent SREBP-1a mRNA  
796 translation in response to endoplasmic reticulum stress. *Biochem J* **449**, 543-553,  
797 doi:10.1042/BJ20120906 (2013).
- 798 36 Bevilacqua, E. *et al.* eIF2alpha phosphorylation tips the balance to apoptosis during osmotic  
799 stress. *J Biol Chem* **285**, 17098-17111, doi:10.1074/jbc.M110.109439 (2010).
- 800 37 Nicholas, C. *et al.* PRMT5 is upregulated in malignant and metastatic melanoma and regulates

801 expression of MITF and p27(Kip1.). *PLoS One* **8**, e74710, doi:10.1371/journal.pone.0074710  
 802 (2013).  
 803 38 Gao, F. *et al.* Wt1 functions in ovarian follicle development by regulating granulosa cell  
 804 differentiation. *Hum Mol Genet* **23**, 333-341, doi:10.1093/hmg/ddt423 (2014).  
 805 39 Gao, F. *et al.* The Wilms tumor gene, Wt1, is required for Sox9 expression and maintenance of  
 806 tubular architecture in the developing testis. *Proc Natl Acad Sci U S A* **103**, 11987-11992,  
 807 doi:10.1073/pnas.0600994103 (2006).

808

809 **Table S1. Primers used for real-time PCR analysis.**

| Gene Symbol    | RT Forward Primer 5' to 3' | RT Reverse Primer 5' to 3' |
|----------------|----------------------------|----------------------------|
| <i>Prmt5</i>   | TGGTGGCATAACTTTCGGACT      | TCCAAGCCAGCGGTCAAT         |
| <i>Wt1</i>     | CAAGGACTGCGAGAGAAGGTTT     | TGGTGTGGGTCTTCAGATGGT      |
| <i>Hsd3b1</i>  | CTCAGTTCTTAGGCTTCAGCAATTAC | CCAAAGGCAAGATATGATTTAGGA   |
| <i>Cyp11a1</i> | CCAGTGTCCCCATGCTCAAC       | TGCATGGTCCTTCCAGGTCT       |
| <i>Cyp17a1</i> | GCCCAAGTCAAAGACACCTAAT     | GTACCCAGGCGAAGAGAATAGA     |
| <i>StAR</i>    | CCGGAGCAGAGTGGTGTCA        | CAGTGGATGAAGCACCATGC       |
| <i>Sfl</i>     | CCCAAGAGTTAGTGCTCCAGT      | CTGGGCGTCTTTACGAGG         |
| <i>Foxl2</i>   | ACAACACCGGAGAAACCAGAC      | CGTAGAACGGGAAGTGGCTA       |
| <i>Fshr</i>    | ATGTGTTCTCCAACCTACCCA      | GCTGGCAAGTGTTAATGCCTG      |
| <i>Gapdh</i>   | GTCATTGAGAGCAATGCCAG       | GTGTTGCTACCCCAATGTG        |
| <i>Renilla</i> | CGTGGAACCATGTTGCCATCAA     | ACGGGATTTACGAGGCCATGATA    |
| <i>Firefly</i> | GGTTCCATCTGCCAGGTATCAGG    | CGTCTTCGTCCAGTAAGCTATG     |

810
